# Supplementary figures and images for: Broad geographic sampling reveals the shared basis and environmental correlates of seasonal adaptation in Drosophila
Source: eLife journal article supplement (doi:10.7554/elife.67577), 2021-06-22

**A**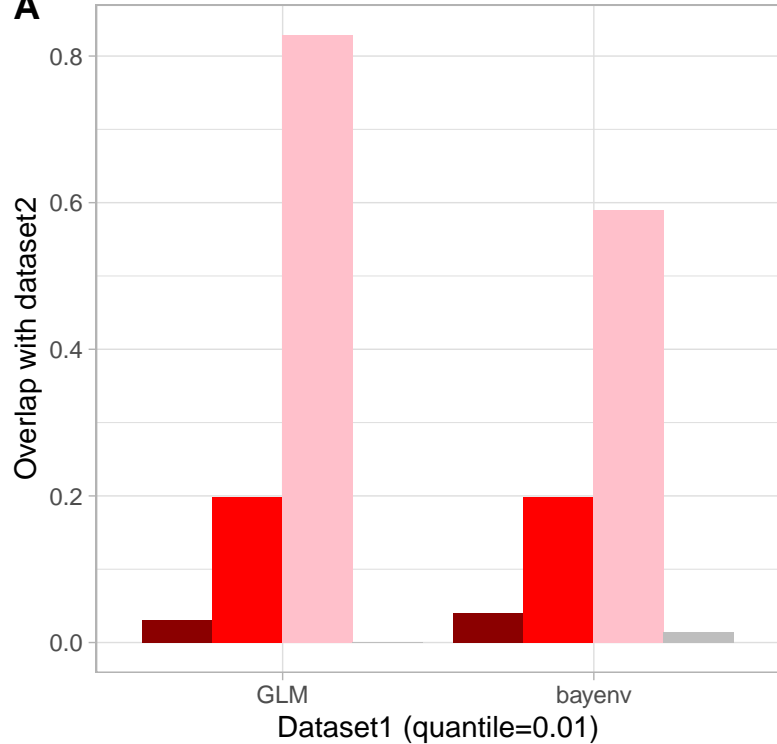**B**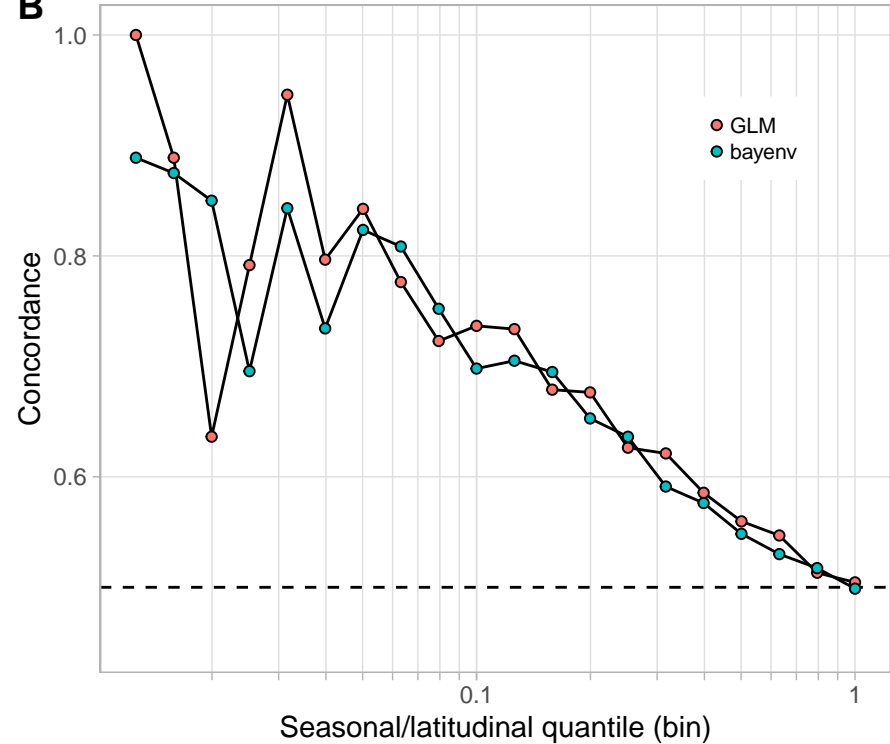

Supplement: supp [file elife-67577-supp-v1.zip]

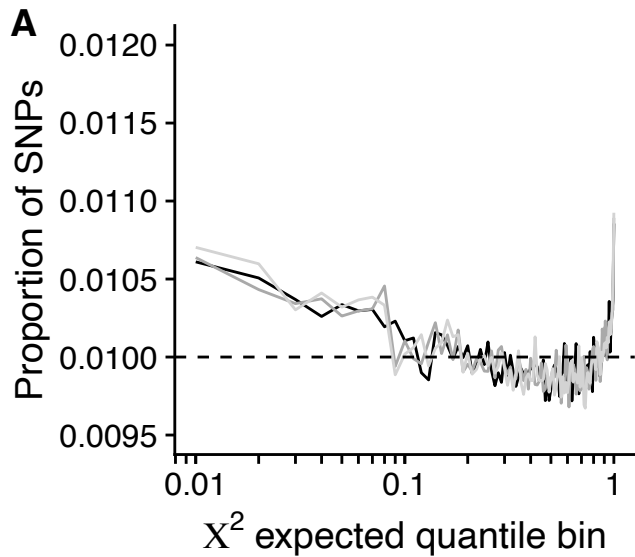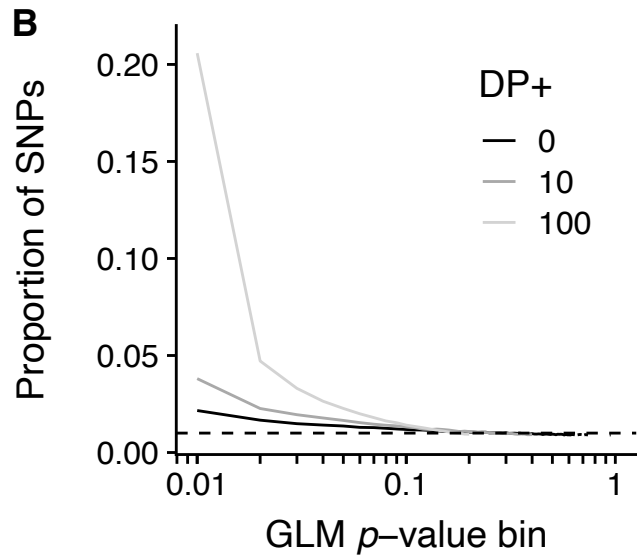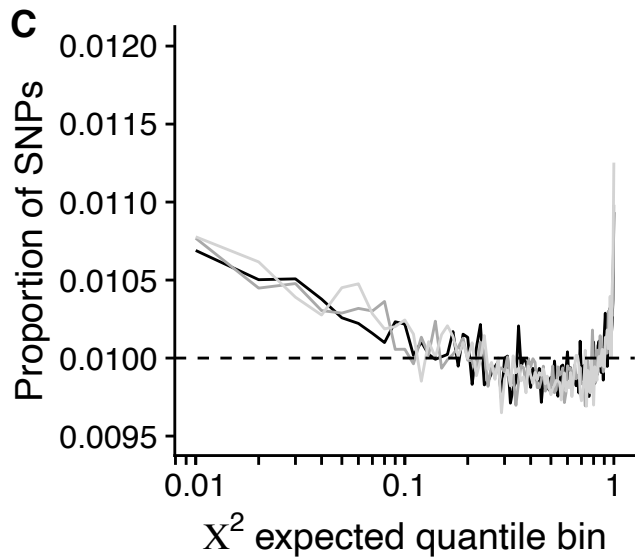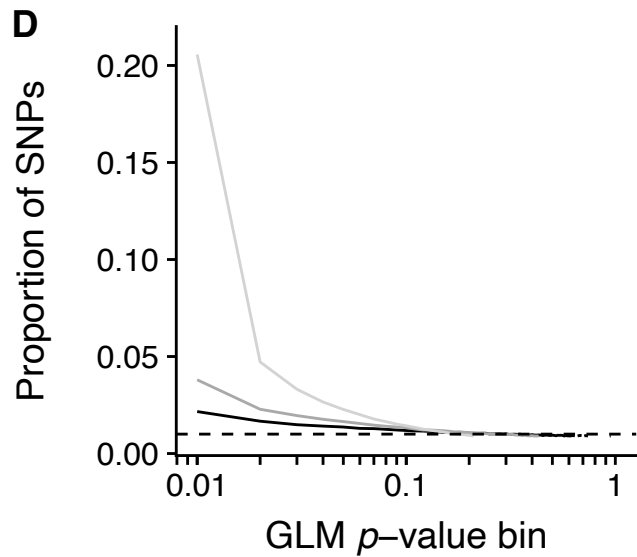

Supplement: supp [file elife-67577-supp-v1.zip]

A

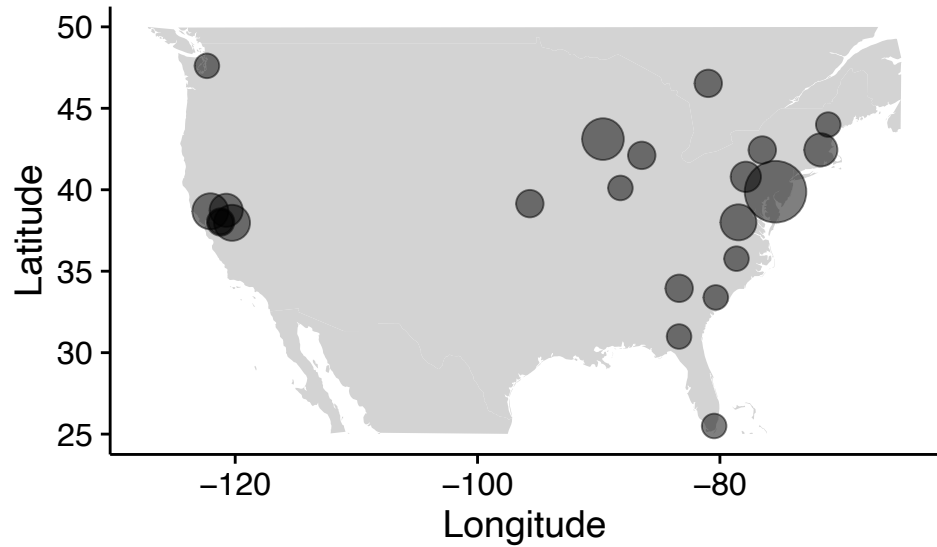

B

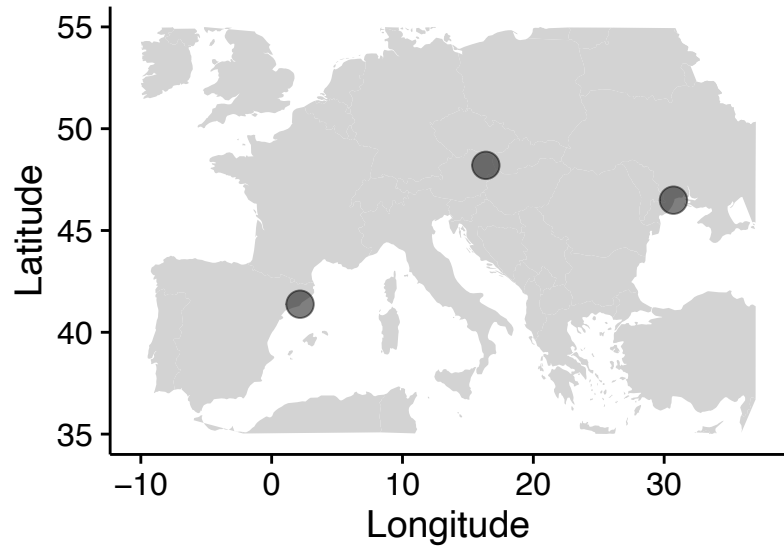

Supplement: supp [file elife-67577-supp-v1.zip]

Seasonal enrichment

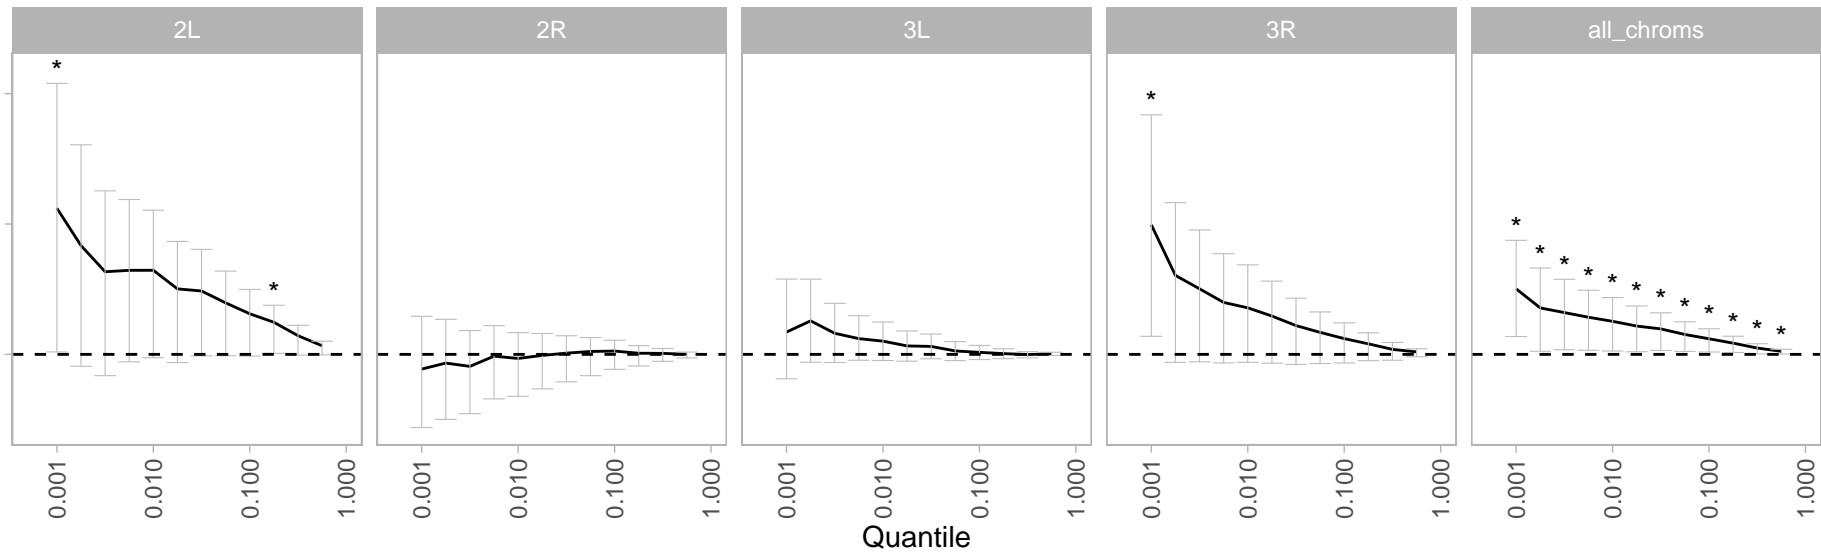

Supplement: supp [file elife-67577-supp-v1.zip]

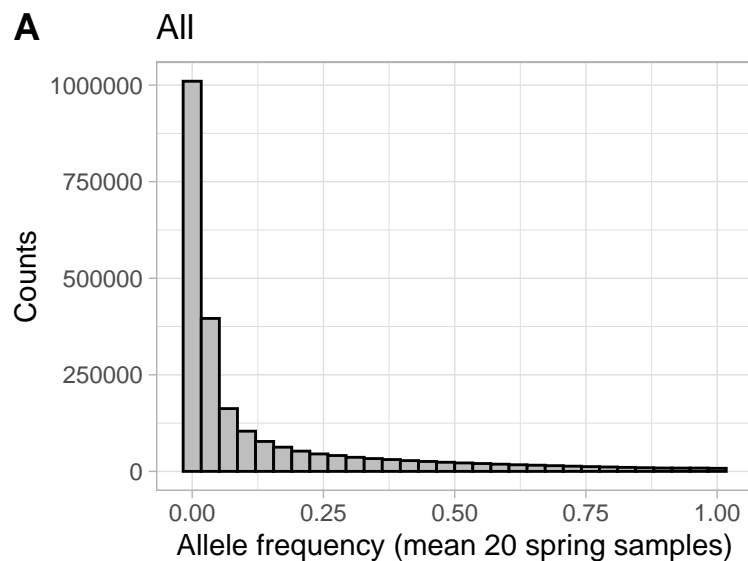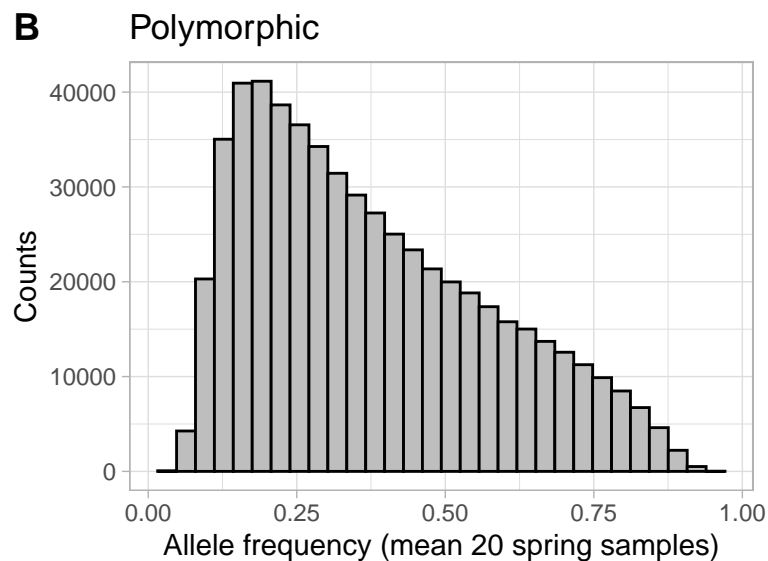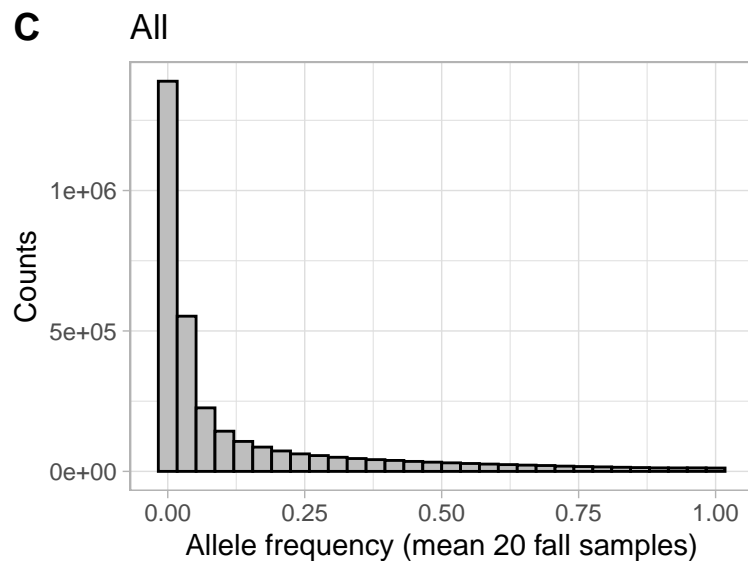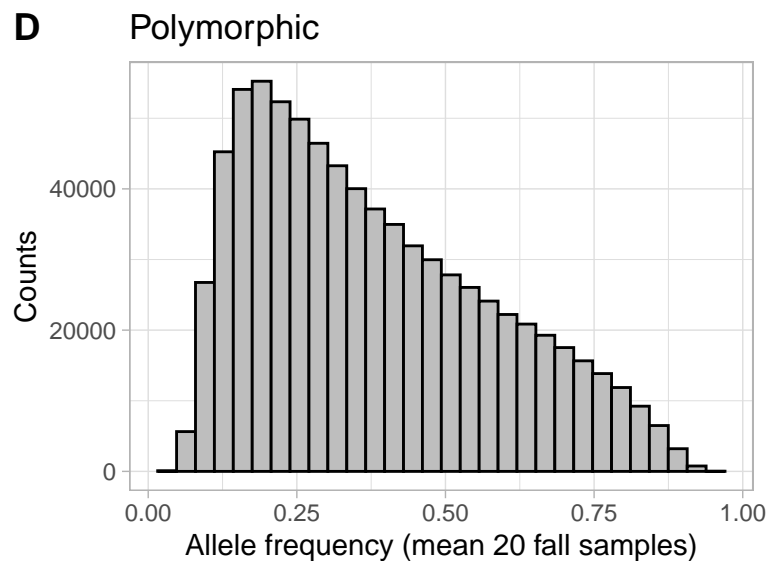

Supplement: supp [file elife-67577-supp-v1.zip]

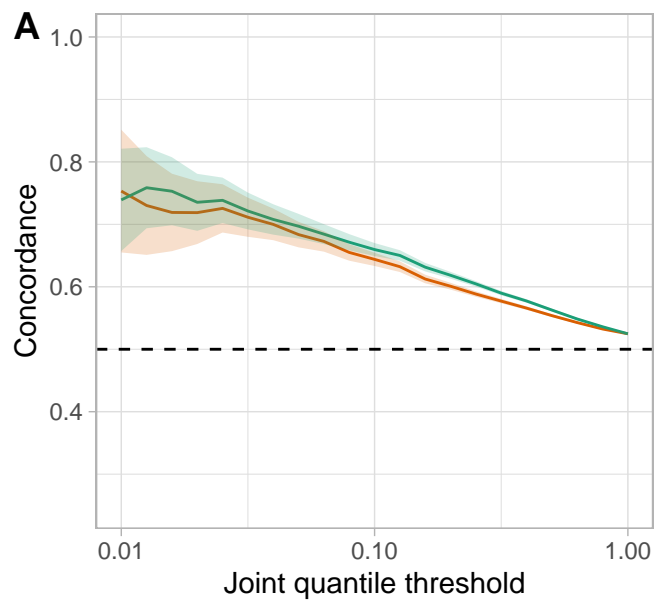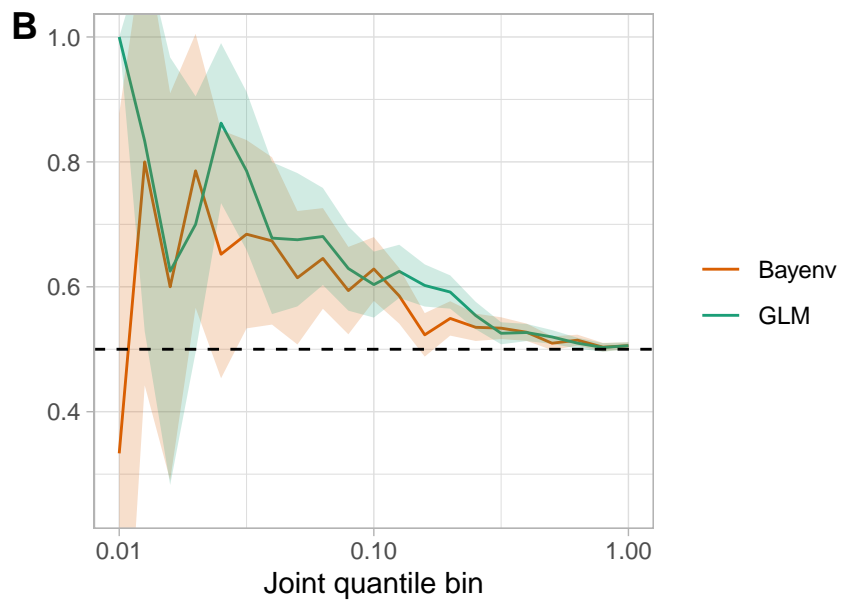

Supplement: supp [file elife-67577-supp-v1.zip]
